# Supplementary material for: The Tumour Suppressor TMEM127 Is a Nedd4-Family E3 Ligase Adaptor Required by Salmonella SteD to Ubiquitinate and Degrade MHC Class II Molecules
Source: PubMed Central journal article supplement (PMC7342019; doi:10.1016/j.chom.2020.04.024), 2020-07-08
Supplement: mmc1.pdf [file mmc1.pdf]

Cell Host & Microbe, Volume 28

## Supplemental Information

**The Tumour Suppressor TMEM127 Is a Nedd4-Family**

**E3 Ligase Adaptor Required by *Salmonella* SteD**

**to Ubiquitinate and Degrade MHC Class II Molecules**

**Eric Alix, Camilla Godlee, Ondrej Cerny, Samkeliso Blundell, Romina Tocci, Sophie Matthews, Mei Liu, Jonathan N. Pruneda, Kirby N. Swatek, David Komander, Tabitha Sleaf, and David W. Holden**

Figure S1.

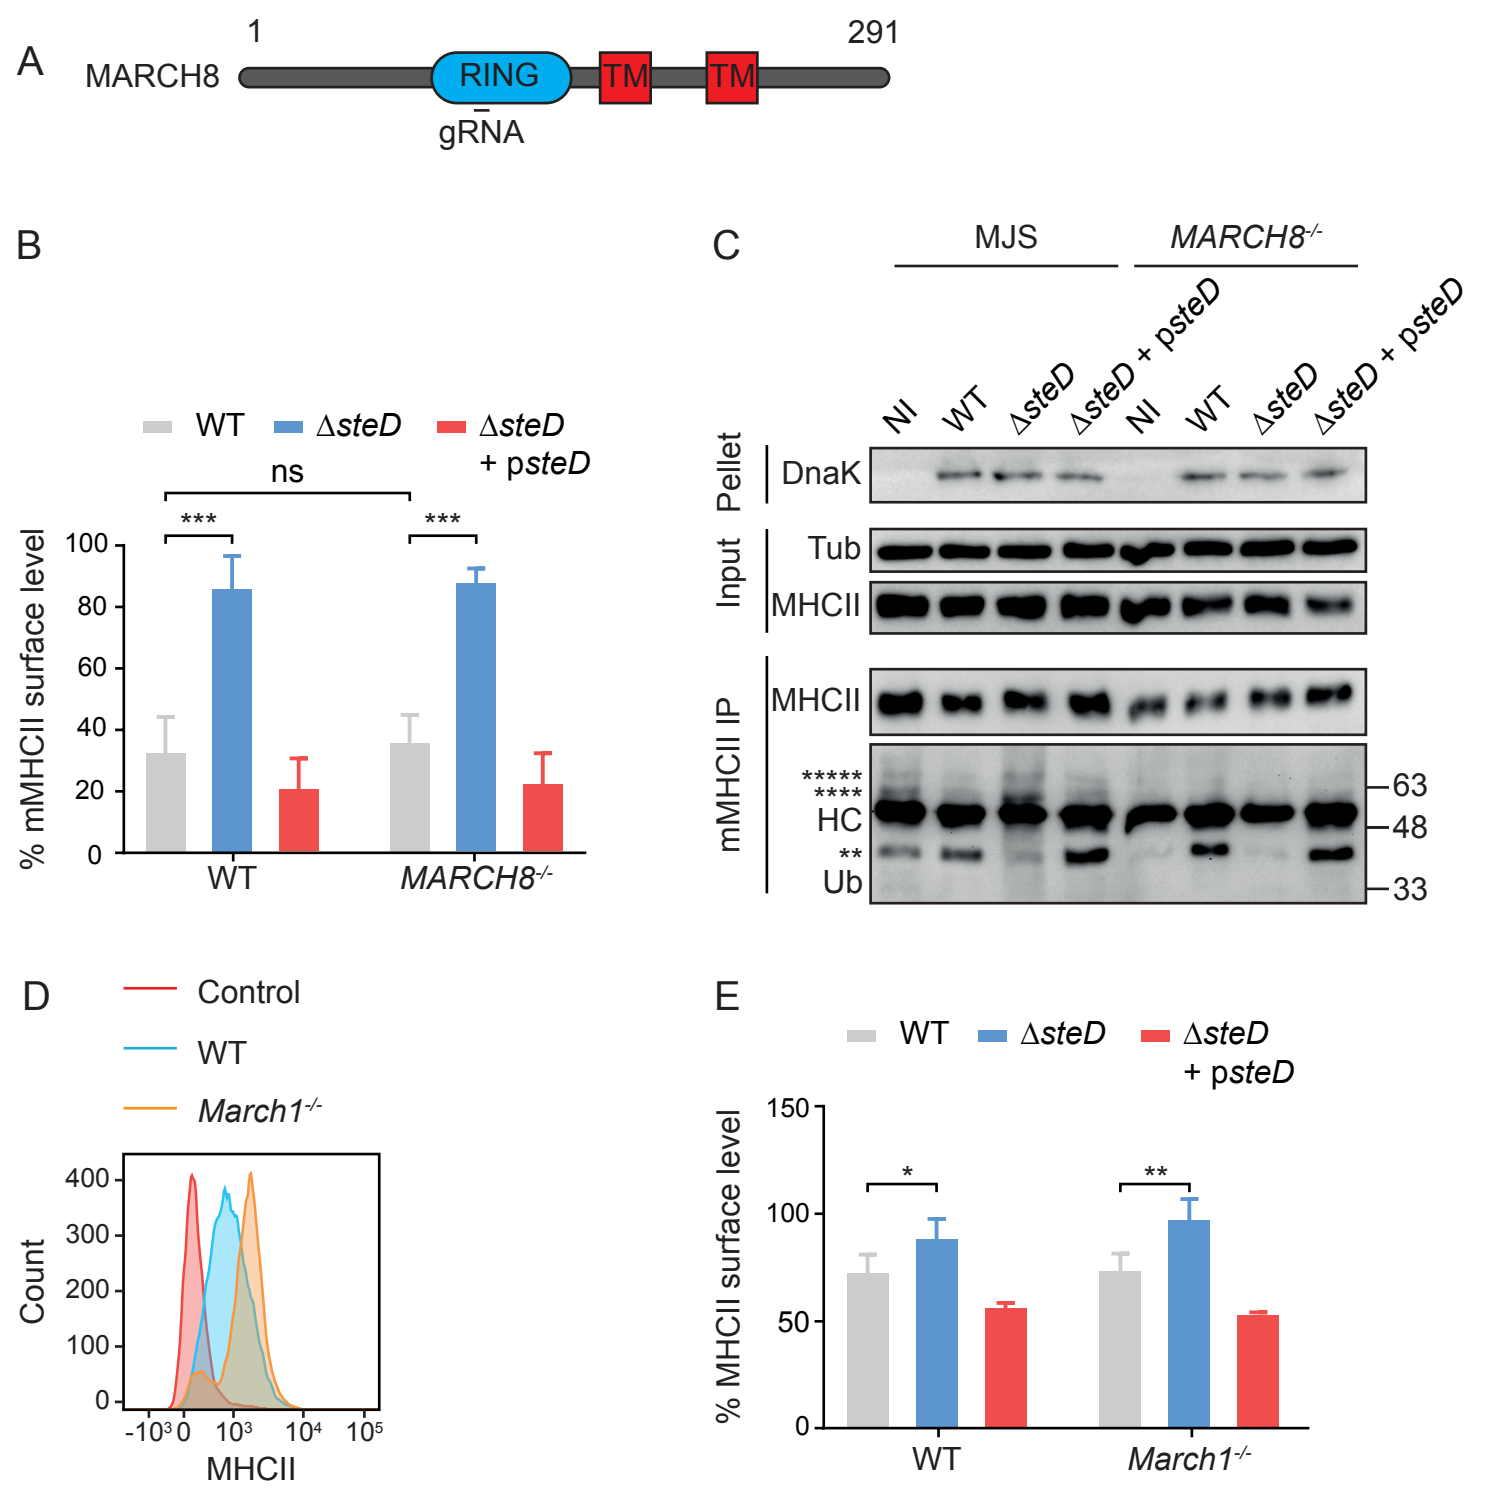

**Figure S1. MARCH E3 ligases are not required for SteD-dependent MHCII regulation, Related to Figure 1.**

- (A) Schematic of MARCH8 indicating the localization of the gRNAs in the knockout used in B. RING – RING finger domain. TM - transmembrane domain.
- (B) Quantification of mMHCII surface levels in wild-type (WT) or *MARCH8*<sup>-/-</sup> Mel Juso cells infected with the indicated *Salmonella* strains. Cells were analysed by flow cytometry 20 h p.i. and amounts of surface mMHCII in infected cells are expressed as a percentage of uninfected cells in the same sample. Data are from 3 independent experiments and show means ± SD. \*\*\* p < 0.001, ns – non-significant (two-way ANOVA followed by Tukey's multiple comparison test).
- (C) Wild-type (WT) or *MARCH8*<sup>-/-</sup> Mel Juso cells, non-infected (NI) or infected with the indicated *Salmonella* strains were lysed and proteins were immunoprecipitated with L243 antibody. Samples were analysed by immunoblot using anti-DRα (MHCII), anti-tubulin (Tub), anti-ubiquitin (Ub) and anti-DnaK (as a marker for *Salmonella*) antibodies. HC – IgG heavy chain. Protein size markers (kDa) are indicated on right. Ubiquitin blot detects ubiquitinated mMHCII β chain (unmodified β chain – 29 KDa). Bands corresponding to di-, tetra- and penta-ubiquitinated mMHCII are indicated by \*\*, \*\*\*\* and \*\*\*\*\*.
- (D) Representative FACS histograms showing surface levels of total MHCII in wild-type (WT) or *March1*<sup>-/-</sup> MutuDCs. Control – unlabelled sample. The plots are representative of three independent experiments.
- (E) Quantification of total MHCII surface levels in wild-type (WT) or *March1*<sup>-/-</sup> MutuDCs infected with the indicated *Salmonella* strains. Cells were analysed by flow cytometry 20 h p.i. and amounts of total surface MHCII in infected cells as a percentage of those in uninfected cells from the same sample. Data are from 3 independent experiments and show means ± SD. \*\* p < 0.01, \* p < 0.05 (Student's T-test).

Figure S2.

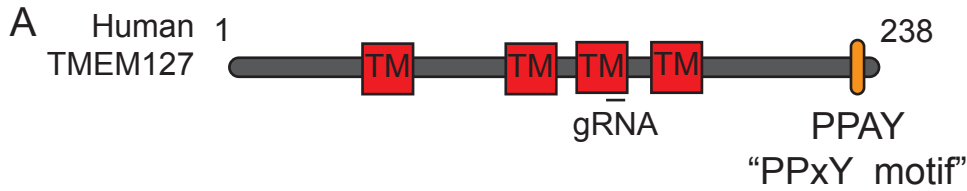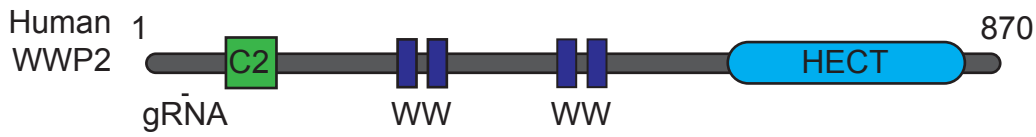

**B**

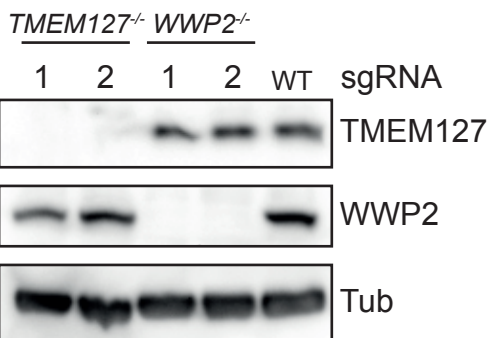

**C**

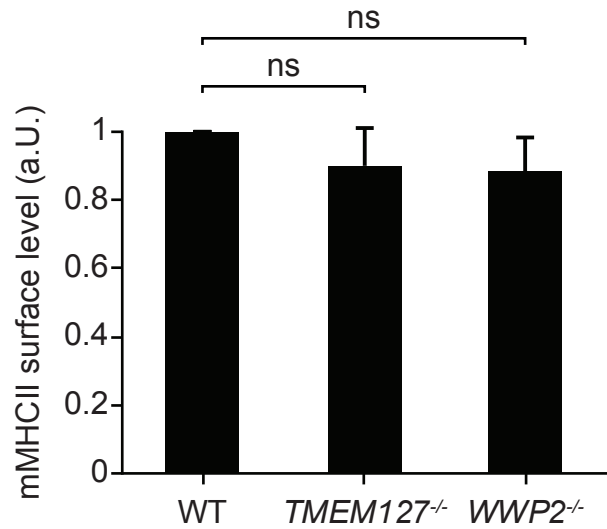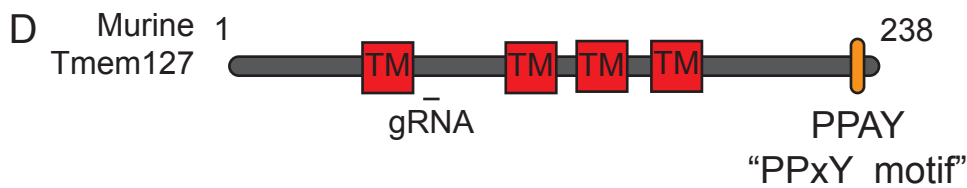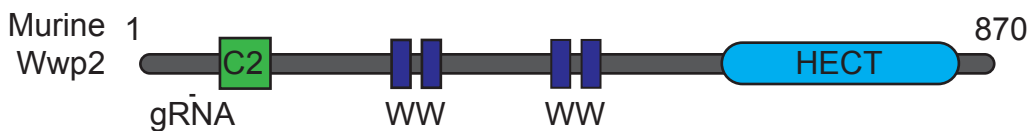

**E**

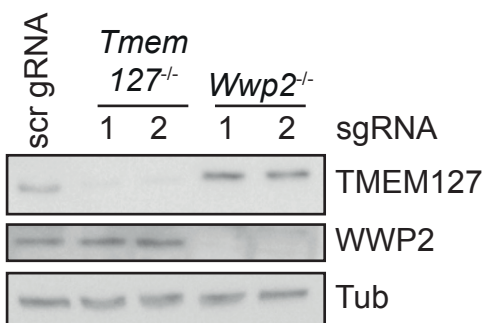

**F**

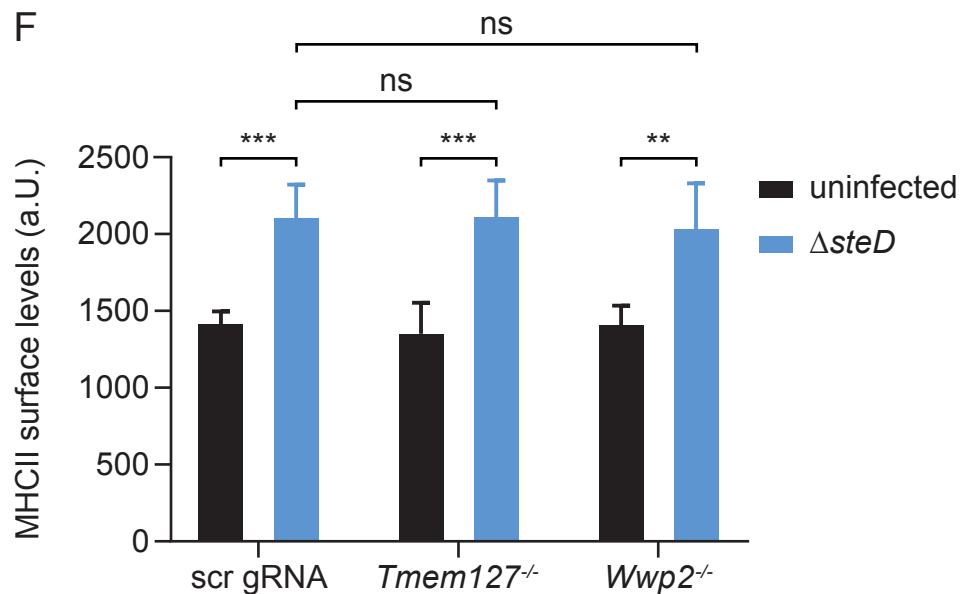



**Figure S2. Generation of *WWP2*<sup>-/-</sup> and *TMEM127*<sup>-/-</sup> Mel Juso cells and *Wwp2*<sup>-/-</sup> and *Tmem127*<sup>-/-</sup> MutuDCs, Related to Figures 2 and 3.**

- (A) Schematic of human TMEM127 and WWP2 showing positions of the gRNA used to make Mel Juso cell knockouts in all further experiments. The PPxY motif and predicted transmembrane domains (TM) are indicated in TMEM127, and the C2 lipid-binding domain, WW protein-interaction domain and HECT E3 ubiquitin ligase domain are shown for WWP2.
- (B) Immunoblot analysis of mutant Mel Juso cell lysates showing absence of TMEM127 or WWP2 in two independent knockout clones. Clones 1 were used for subsequent experiments. Blots were probed with antibodies against TMEM127, WWP2 and tubulin (Tub).
- (C) Quantification of mMHCII surface levels in wild-type (WT), *TMEM127*<sup>-/-</sup> or *WWP2*<sup>-/-</sup> Mel Juso cells. Cells were analysed by flow cytometry and levels of surface mMHCII from 3 independent experiments are indicated with means  $\pm$  SD. ns – non-significant (one sample T-test).
- (D) Schematic of murine *Tmem127* and *Wwp2* showing positions of the gRNA used to make MutuDC cell knockouts in all further experiments. The PPxY motif and predicted transmembrane domains (TM) are indicated in *Tmem127*, and the C2 lipid-binding domain, WW protein-interaction domain and HECT E3 ubiquitin ligase domain are shown for *Wwp2*.
- (E) Immunoblot analysis of mutant MutuDC lysates showing absence of *Tmem127* or *Wwp2* in two independent knockout MutuDC clones. Clones 1 were used for subsequent experiments. Blots were probed with antibodies against TMEM127, WWP2 and tubulin (Tub).
- (F) Quantification of total MHCII surface levels in scrambled (scr) gRNA, *Tmem127*<sup>-/-</sup> or *Wwp2*<sup>-/-</sup> MutuDC cells. Cells were analysed by flow cytometry and levels of total surface MHCII from 3 independent experiments are indicated with means  $\pm$  SD. \*\*\*  $p < 0.001$ . \*\*  $p < 0.01$ . ns not significant (two-way ANOVA followed by Tukey's multiple comparison test).

Figure S3.

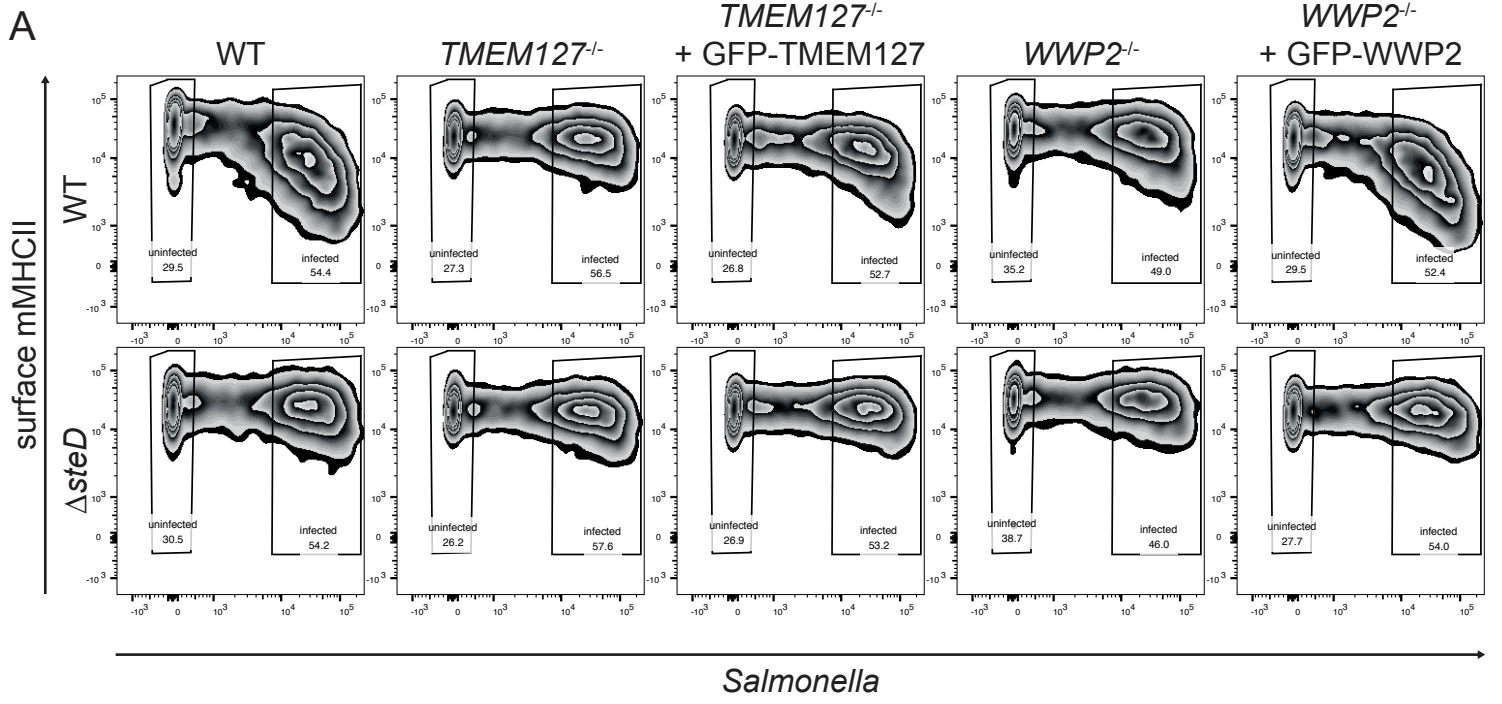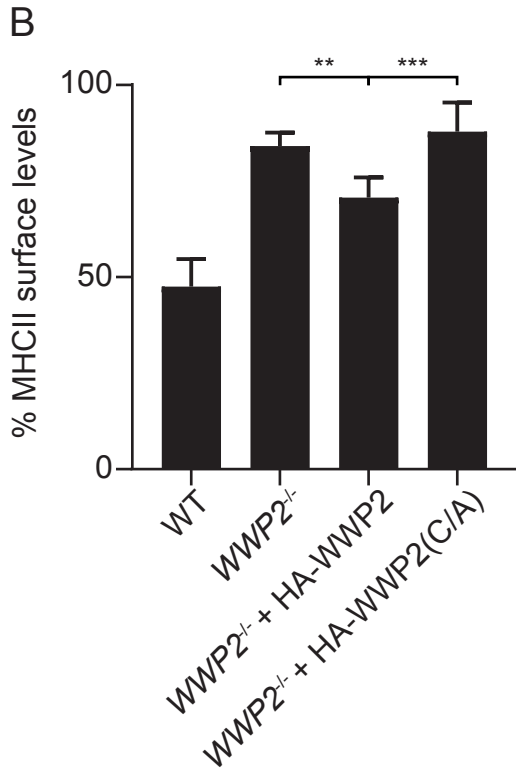

**Figure S3. Complementation of *WWP2*<sup>-/-</sup> and *TMEM127*<sup>-/-</sup> Mel JuSo cells, Related to Figure 2.**

- (A) Representative flow cytometry plots showing surface levels of mMHCII in infected cells compared to uninfected cells. Wild-type (WT), mutant and complemented Mel JuSo cells were infected with wild-type (WT) or *steD* mutant mCherry-expressing *Salmonella*. Numbers shown are percentage of total cells in each gate. Y axis: Surface mMHCII L243 antibody; X axis: mCherry levels.
- (B) Quantification of mMHCII surface levels in wild-type (WT) or *WWP2*<sup>-/-</sup> Mel JuSo cells expressing HA-tagged WWP2 or a catalytic dead point mutant of WWP2 (C/A) infected with mCherry-expressing wild-type *Salmonella*. Cells were analysed by flow cytometry and amounts of surface mMHCII in infected cells are expressed as a percentage of uninfected cells in the same sample. Data are from 3 independent experiments and show means  $\pm$  SD. \*\*  $p < 0.01$ , \*\*\* $p < 0.001$  (one-way ANOVA followed by Tukey's multiple comparison test).

Figure S4.

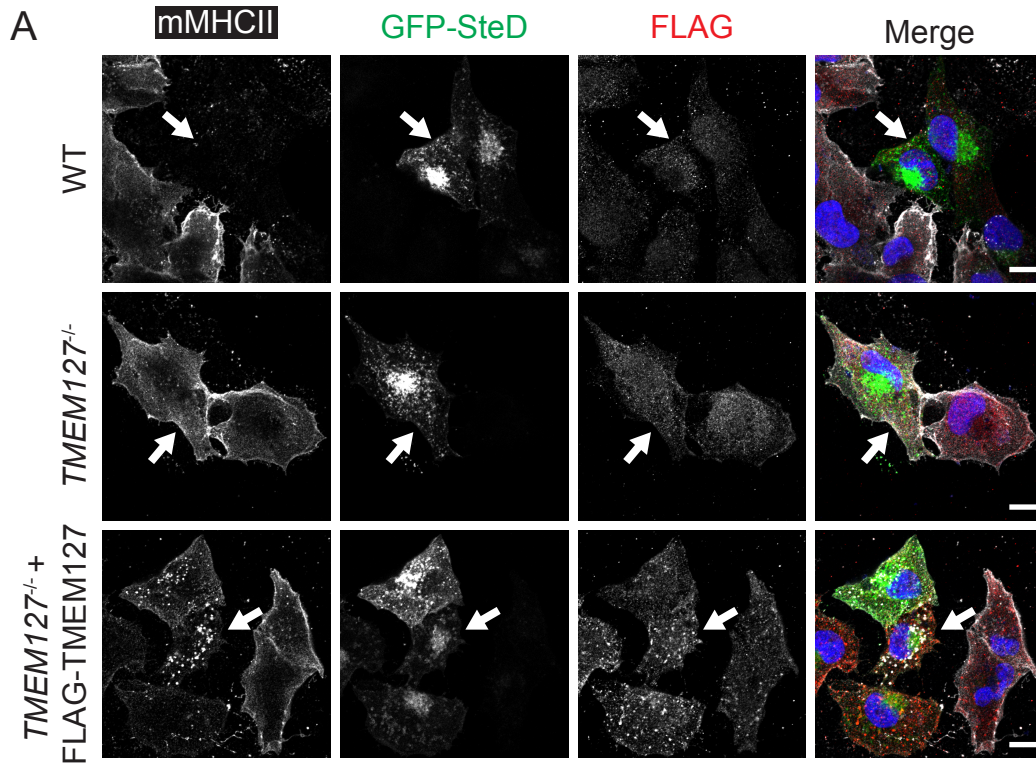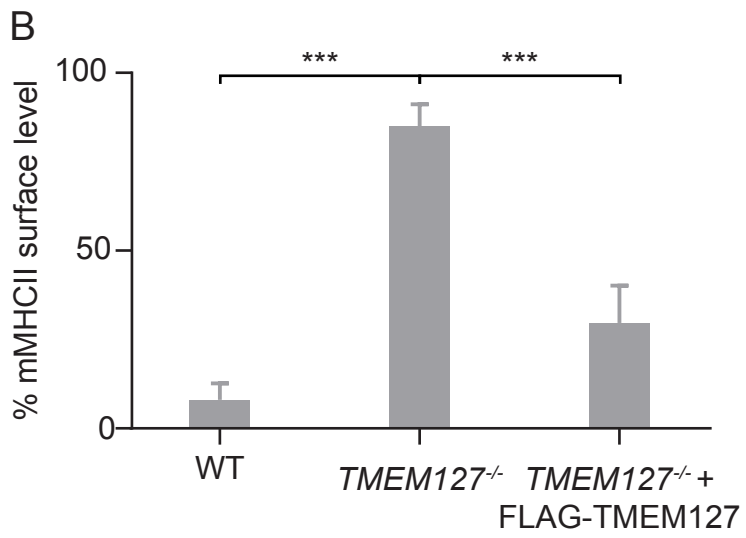

**Figure S4. FLAG-TMEM127 complements requirement of TMEM127 for SteD-dependent reduction of surface mMHCII, Related to Figures 4 and 5.**

- (A) Representative confocal immunofluorescence microscopy images of wild-type (WT) or *TMEM127*<sup>-/-</sup> Mel JuSo cells expressing FLAG-TMEM127 (red) and GFP-SteD (green). Cells were fixed and labeled for surface mMHCII (L243 antibody, white). Arrows show transfected cells. Scale bar - 10  $\mu$ m.
- (B) Quantification of total mMHCII surface levels in wild-type (WT), *TMEM127*<sup>-/-</sup> or *TMEM127*<sup>-/-</sup> cells stably expressing FLAG-TMEM127, transiently expressing GFP-SteD. Cells were analysed by flow cytometry and amounts of surface mMHCII in GFP-positive cells are expressed as a percentage of GFP-negative cells in the same sample. Data are from 3 independent experiments and show means  $\pm$  SD. \*\*\*  $p < 0.001$  (one-way ANOVA followed by Tukey's multiple comparison test).

Figure S5.

A

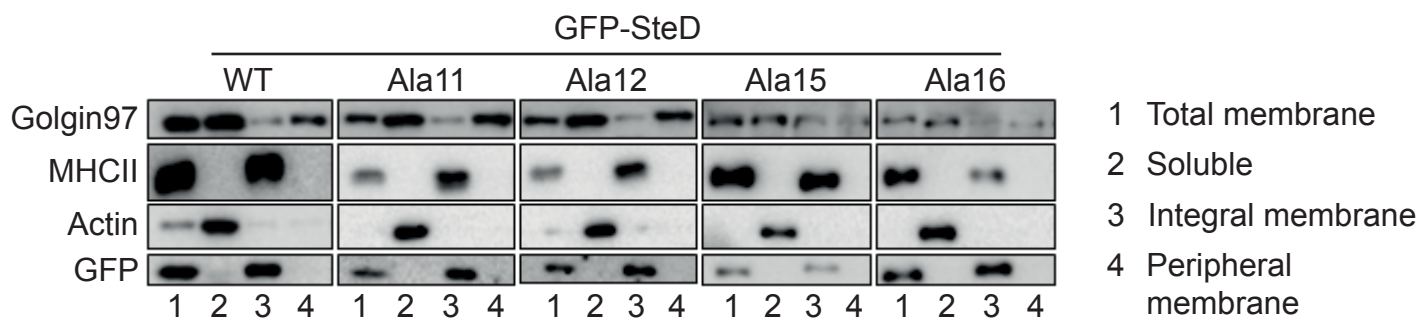

B

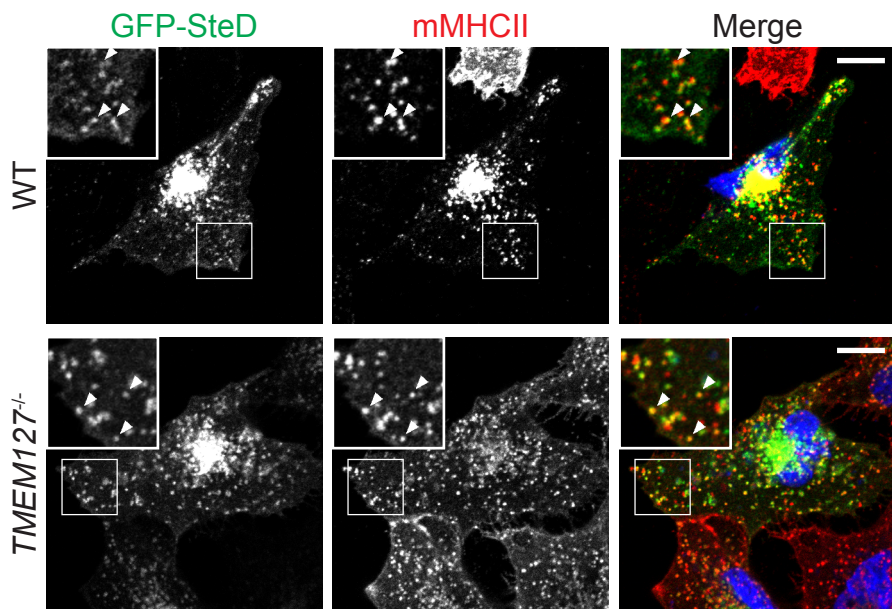

C

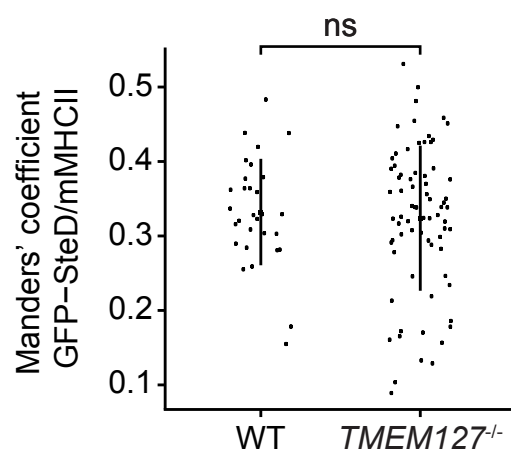

D

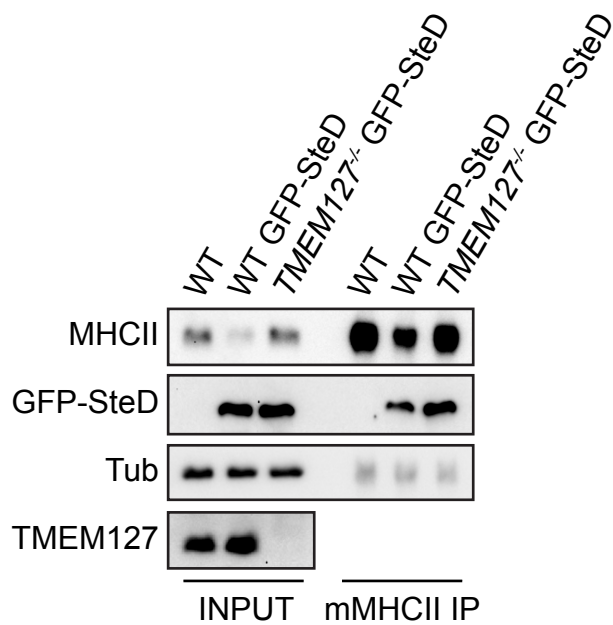

E

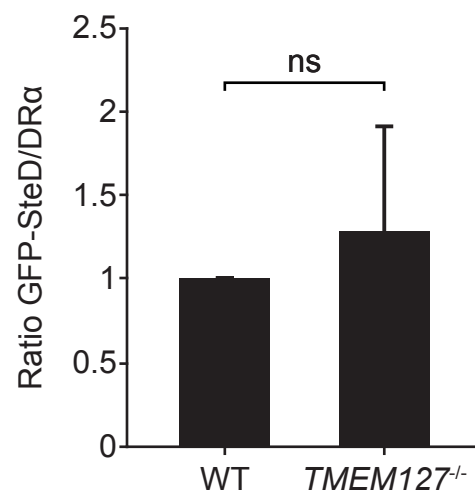

**Figure S5. Analysis of the interactions between SteD, TMEM127 and MHCII, Related to Figure 5.**

- (A) Mel JuSo cells expressing GFP-SteD (WT) or four alanine (Ala) mutants (as shown in Fig. 5C) were lysed and the total membrane fraction was separated from soluble proteins by centrifugation. Peripherally-associated proteins were separated from integral membrane proteins by washing the membrane fraction with 2.5 M urea followed by centrifugation. The different fractions were analysed by immunoblot using anti-Golgin97, anti-DR $\alpha$  (MHCII), anti-Actin and anti-GFP antibodies.
- (B) Representative confocal immunofluorescence microscopy images of wild-type (WT) or *TMEM127*<sup>-/-</sup> Mel JuSo cells expressing GFP-SteD (green). Cells were fixed and labeled for total mMHCII (L243 antibody, red) and stained with DAPI (blue). Magnified boxed areas show vesicular colocalization of the two proteins (arrowheads). Scale bar - 10  $\mu$ m.
- (C) Mander's overlap coefficient of the fraction of GFP-SteD positive pixels that colocalise with mMHCII positive pixels in wild-type (WT) or *TMEM127*<sup>-/-</sup> Mel JuSo cells. Data are representative of three independent experiments. Each dot represents the value for one cell. Error bars show mean  $\pm$  SD. ns – not significant (Student's T-test).
- (D) Wild-type (WT) or *TMEM127*<sup>-/-</sup> Mel JuSo cells expressing GFP-SteD (where indicated) were lysed and proteins were immunoprecipitated with L243 antibody. Samples were analysed by immunoblot using anti-DR $\alpha$  (MHCII), anti-GFP, anti-tubulin (Tub) and anti-TMEM127 antibodies.
- (E) Quantification of intensity of GFP-SteD signal in immunoprecipitates in (D) relative to immunoprecipitated MHCII (DR $\alpha$ ) in wild-type (WT) or *TMEM127*<sup>-/-</sup> Mel JuSo cells. Data show means  $\pm$  SD from 3 independent experiments. ns – not significant (Student's T-test).

Figure S6.

A

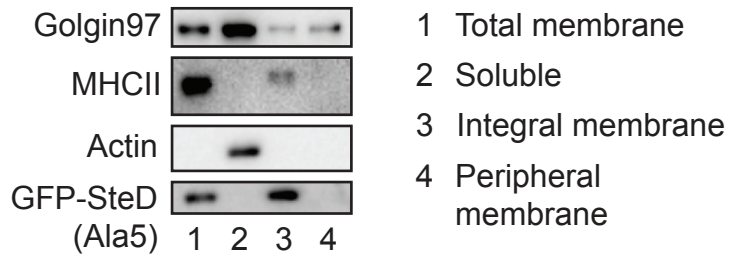

B

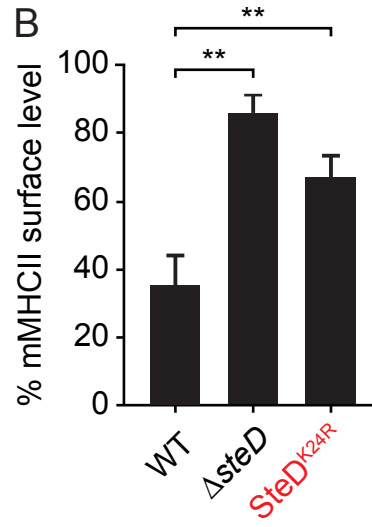



**Figure S6. Analysis of the K24R SteD mutant, Related to Figure 6.**

- (A) Mel Juso cells stably expressing the Ala5 mutant of GFP-SteD (as shown in Fig. 5C) were lysed and the total membrane fraction was separated from soluble proteins by centrifugation. Peripherally-associated proteins were separated from integral membrane proteins by washing the membrane fraction with 2.5 M urea followed by centrifugation. The different fractions were analysed by immunoblot using anti-Golgin97, anti-DR $\alpha$  (MHCII), anti-Actin and anti-GFP antibodies.
- (B) Quantification of mMHCII surface levels in Mel Juso cells infected with the indicated *Salmonella* strains for 20 h. SteD<sup>K24R</sup> expressed from the chromosome is indicated in red. Cells were analysed by flow cytometry 20 h p.i. and amounts of surface mMHCII are expressed as a percentage of uninfected cells from the same sample. Data are from 3 independent experiments and show means  $\pm$  SD. \*\*  $p < 0.01$  (one-way ANOVA followed by Tukey's multiple comparison test).

Figure S7

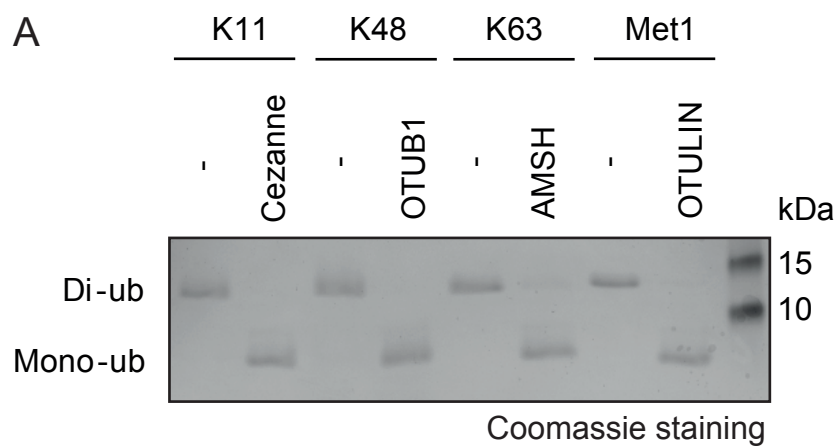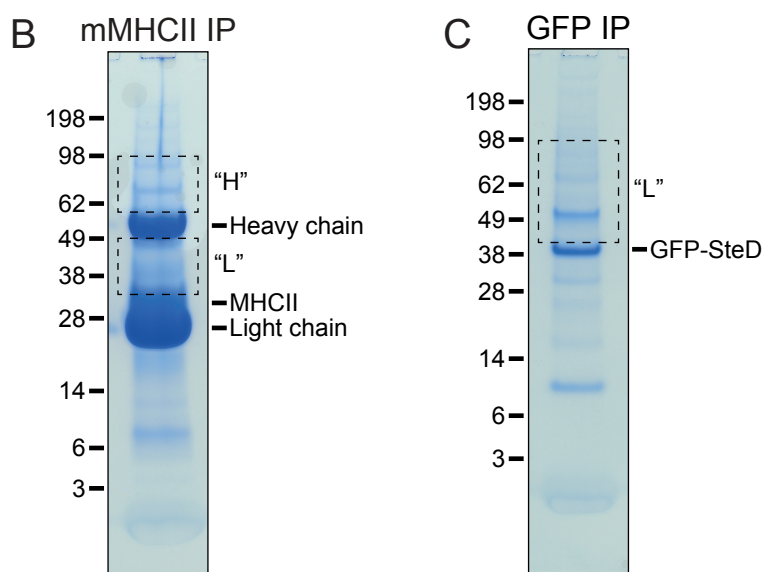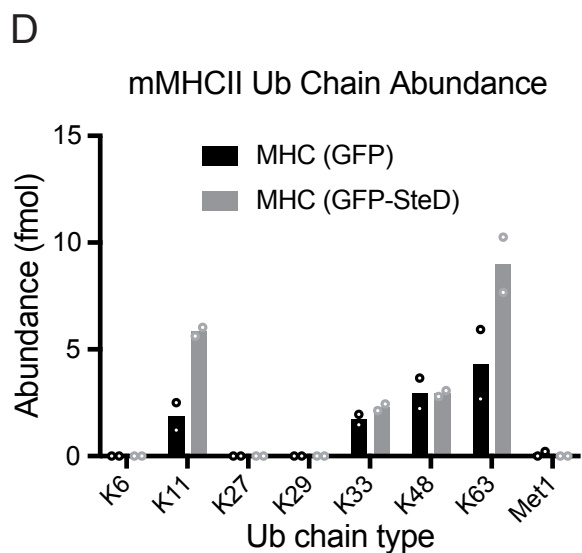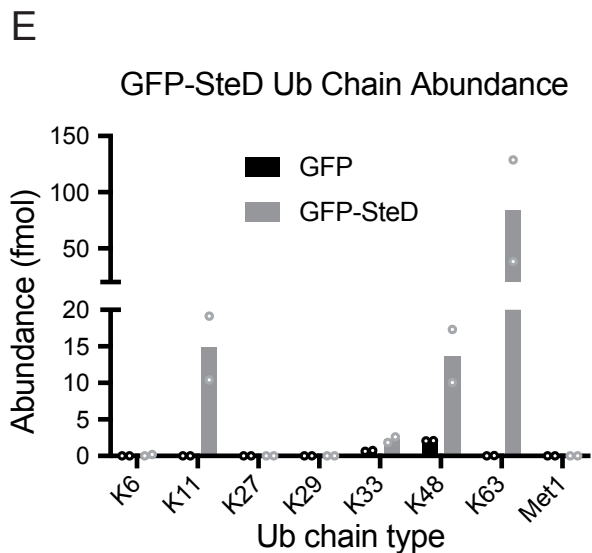

**Figure S7. SteD and mMHCII are ubiquitinated predominantly with K63-linked chains, Related to Figure 7.**

- (A) Enzymes used for UbiCREST assay are functional. Di-ubiquitin chains of indicated linkage types were incubated with the corresponding specific deubiquitinase or buffer only (-). Ubiquitin was separated by SDS-PAGE and detected by Coomassie Blue staining. Protein size markers (kDa) are indicated on right.
- (B) Mel Juso cells stably expressing GFP-SteD were lysed and mMHCII was immunoprecipitated using L243 antibody. Samples were separated by SDS-PAGE and stained with Coomassie Blue. Fractions cut from gels and analysed by AQUA mass spectrometry are labelled as “L” and “H”.
- (C) Mel Juso cells expressing GFP-SteD were lysed and GFP-SteD was precipitated using GFP-trap beads. Samples were separated by SDS-PAGE and stained with Coomassie Blue. Fraction cut from gel and analysed by AQUA mass spectrometry is labelled as “L”.
- (D) Abundance of each type of ubiquitin linkage associated with purified mMHCII in the presence or absence of SteD by AQUA mass spectrometry (Fractions L + H).
- (E) Abundance of each type of ubiquitin linkage associated with purified GFP-SteD compared to GFP by AQUA mass spectrometry (Fraction L).

Table S2. Primer sequences. Related to STAR Methods

| Use                  | Name              | Sequence (5'-3')                                                                                                           |
|----------------------|-------------------|----------------------------------------------------------------------------------------------------------------------------|
| amplification sgRNAs | NGS-Lib-Fwd-1     | AATGATACGGCGACCACCGAGATCTA<br>CACTCTTTCCCTACACGACGCTCTTCC<br>GATCTTAAGTAGAGGCTTTATATATCT<br>TGTGGAAAGGACGAAACACC           |
|                      | NGS-Lib-Fwd-2     | AATGATACGGCGACCACCGAGATCTA<br>CACTCTTTCCCTACACGACGCTCTTCC<br>GATCTATCATGCTTAGCTTTATATATC<br>TTGTGGAAAGGACGAAACACC          |
|                      | NGS-Lib-Fwd-3     | AATGATACGGCGACCACCGAGATCTA<br>CACTCTTTCCCTACACGACGCTCTTCC<br>GATCTGATGCACATCTGCTTTATATAT<br>CTTGTGGAAAGGACGAAACACC         |
|                      | NGS-Lib-Fwd-4     | AATGATACGGCGACCACCGAGATCTA<br>CACTCTTTCCCTACACGACGCTCTTCC<br>GATCTCGATTGCTCGACGCTTTATATA<br>TCTTGTGGAAAGGACGAAACACC        |
|                      | NGS-Lib-Fwd-5     | AATGATACGGCGACCACCGAGATCTA<br>CACTCTTTCCCTACACGACGCTCTTCC<br>GATCTTCGATAGCAATTCGCTTTATAT<br>ATCTTGTGGAAAGGACGAAACACC       |
|                      | NGS-Lib-Fwd-6     | AATGATACGGCGACCACCGAGATCTA<br>CACTCTTTCCCTACACGACGCTCTTCC<br>GATCTATCGATAGTTGCTTGCTTTATA<br>TATCTTGTGGAAAGGACGAAACACC      |
|                      | NGS-Lib-Fwd-7     | AATGATACGGCGACCACCGAGATCTA<br>CACTCTTTCCCTACACGACGCTCTTCC<br>GATCTGATCGATCCAGTTAGGCTTTAT<br>ATATCTTGTGGAAAGGACGAAACACC     |
|                      | NGS-Lib-Fwd-8     | AATGATACGGCGACCACCGAGATCTA<br>CACTCTTTCCCTACACGACGCTCTTCC<br>GATCTCGATCGATTTGAGCCTGCTTTA<br>TATATCTTGTGGAAAGGACGAAACAC C   |
|                      | NGS-Lib-Fwd-9     | AATGATACGGCGACCACCGAGATCTA<br>CACTCTTTCCCTACACGACGCTCTTCC<br>GATCTACGATCGATACACGATCGCTTT<br>ATATATCTTGTGGAAAGGACGAAACA CC  |
|                      | NGS-Lib-Fwd-10    | AATGATACGGCGACCACCGAGATCTA<br>CACTCTTTCCCTACACGACGCTCTTCC<br>GATCTTACGATCGATGGTCCAGAGCTT<br>TATATATCTTGTGGAAAGGACGAAAC ACC |
|                      | NGS-Lib-KO-Rev- 1 | CAAGCAGAAGACGGCATAACGAGATTC<br>GCCTTGGTGACTGGAGTTCAGACGTG<br>TGCTCTTCCGATCTCCGACTCGGTGCC<br>ACTTTTTCAA                     |
|                      | NGS-Lib-KO-Rev- 2 | CAAGCAGAAGACGGCATAACGAGATAT<br>AGCGTCGTGACTGGAGTTCAGACGTG<br>TGCTCTTCCGATCTCCGACTCGGTGCC<br>ACTTTTTCAA                     |
|                      | NGS-Lib-KO-Rev- 3 | CAAGCAGAAGACGGCATAACGAGATGA<br>AGAAGTGTGACTGGAGTTCAGACGTG<br>TGCTCTTCCGATCTCCGACTCGGTGCC<br>ACTTTTTCAA                     |

|                           |                           |                                                                                                        |
|---------------------------|---------------------------|--------------------------------------------------------------------------------------------------------|
|                           | NGS-Lib-KO-Rev- 4         | CAAGCAGAAGACGGCATAACGAGATAT<br>TCTAGGGTGACTGGAGTTCAGACGTG<br>TGCTCTTCCGATCTCCGACTCGGTGCC<br>ACTTTTTCAA |
|                           | NGS-Lib-KO-Rev- 5         | CAAGCAGAAGACGGCATAACGAGATCG<br>TTACCAGTGACTGGAGTTCAGACGTG<br>TGCTCTTCCGATCTCCGACTCGGTGCC<br>ACTTTTTCAA |
|                           |                           |                                                                                                        |
| SteD K24R construction    | ovK24R-F                  | tgacgaacgaccgtagctgaaatc                                                                               |
|                           | ovK24R-R                  | ctaccggtcgttcgctcattaccocg                                                                             |
|                           | SteD-Hind-F               | tgcaacaagcttgatcgaattctgataacg                                                                         |
|                           | SteD-Sac-R                | tgcaacgagctccaccggtcaccgtataa                                                                          |
|                           |                           |                                                                                                        |
| sgRNA MARCH8              | MARCH8-1                  | CACCGGGCAGGCCTGGTGCACGAAG                                                                              |
|                           | MARCH8-2                  | AAACCTTCGTGCACCAGGCCTGCCC                                                                              |
|                           | MARCH8-3                  | CACCGAGTGGCAGGGGGTGATCAGG                                                                              |
|                           | MARCH8-4                  | AAACCCTGATCACCCCCTGCCACTC                                                                              |
|                           | MARCH8-5                  | CACCGAGGCCTGGTGCACGAAGTGG                                                                              |
|                           | MARCH8-6                  | AAACCCACTTCGTGCACCAGGCCTC                                                                              |
|                           |                           |                                                                                                        |
| sequence lentiguide-puro  | hGata4-rev                | ATTGTGGATGAATACTGCC                                                                                    |
|                           |                           |                                                                                                        |
| K24R chromosomal mutation | pGP704_SteD_R_SacI        | aaccggGAGCTCgggtatcataataaatgagc                                                                       |
|                           | pGP704 SteD F SalI        | aaccggGTCGACcgaacatacgtcagttatcag                                                                      |
|                           | pWRG100_dsteD_F           | tctcataaacataaacagcatgtgcatgaagaggttat<br>cgccttaagccccccctgc                                          |
|                           | pWRG100_dsteD_R           | ggaattcgtctttccctatgacttgcgtgtttgctcat<br>ctagactatattaccctgtt                                         |
|                           |                           |                                                                                                        |
| cloning HA-SteD into M6P  | M6P_Nco_SteD_F            | AAGCCATGGGAGGAtatccgtatgatgtgccgactatgcgtat<br>ccgtatgatgttctctgattatgctGGAatgaatgtcacttcaggcgtg       |
|                           | M6P_Not_SteD_R            | AACGCGGCCGCTTAtggccaggctggccgggtctg                                                                    |
|                           |                           |                                                                                                        |
| sgRNA MJS lentiguide      | TMEM127 1 F               | CACCGCTGCAGTGTGCCACCGTCAT                                                                              |
|                           | TMEM127 1 R               | AAACATGACGGTGGCACACTGCAGC                                                                              |
|                           | TMEM127 2 F               | CACCGGTGCACATAGCCCAACACGT                                                                              |
|                           | TMEM127 2 R               | AAACACGTGTTGGGCTATGTGCACC                                                                              |
|                           | WWP2 1 F                  | CACCGACCTCGAATTAACTCCTACG                                                                              |
|                           | WWP2 1 R                  | AAACCGTAGGAGTTAATTCGAGGTC                                                                              |
|                           | WWP2 2 F                  | CACCGAGGTTGACGATTATGCACCT                                                                              |
|                           | WWP2 2 R                  | AAACAGGTGCATAATCGTCAACCTC                                                                              |
|                           |                           |                                                                                                        |
| sequencing gDNA KOs       | gWWP2 F                   | AAAGAGCCGGAACATCTGCCACAGG                                                                              |
|                           | gWWP2 R                   | CAGGGAATCTGTACCTCCCACAACC                                                                              |
|                           | gTMEM127 F1               | GTCAAGAGAGCTCCTCCTTGACAGAG                                                                             |
|                           | gTMEM127 R1               | CCAGCTCCTGCCACCAGGTAGAAGC                                                                              |
|                           | gTMEM127 F2               | GAGCGTAGCCTGGCCTCGGCCCTGC                                                                              |
|                           | gTMEM127 R2               | TGGGCATGAACACCAGGCAGTTATG                                                                              |
|                           | TMEM127-BsmBI_NcoI_Flag-F | aaccgtctcacatggccgattacaaggatgacgacgataaggctggaatgtac<br>gccccggagg                                    |
|                           | TMEM127-BsmBI NotI-R      | aaccgtctcaggccgcttaggggtgtaagcaggg                                                                     |
|                           | TMEM127-BsmBI PciI F      | aaccgtctcacatgtccatgtacgccccggagg                                                                      |
|                           | TMEM127 PY BsmBI NotI-R   | aaccgtctcaggccgc ttaggggtgtagcaggggggtgctggaa                                                          |

|                        |                              |                                                                        |
|------------------------|------------------------------|------------------------------------------------------------------------|
|                        | WWP2-BsmBI_NcoI_Flag-F       | aaccgtctcacatggccgattacaaggatgacgacgataaggctggaatggc<br>atctgccagctcta |
|                        | WWP2-BsmBI NotI-R            | aaccgtctcaggccgcttactcctgtccaagccc                                     |
|                        | WWP2-BsmBI PciI_F            | aaccgtctcacatgtccatggcatctgccagctcta                                   |
|                        |                              |                                                                        |
| sgRNA mouse lentiguide | Mouse WWP2 sgRNA 1F          | CACCGCCAGCGAGACCAAGAAGAC                                               |
|                        | Mouse WWP2 sgRNA 1R          | AAACGTCTTCTTGGTCTCGCTGGGC                                              |
|                        | Mouse WWP2 sgRNA 2F          | CACCGACTGCTTTGGTGGCAGATCC                                              |
|                        | Mouse WWP2 sgRNA 2R          | AAACGGATCTGCCACCAAGCAGTC                                               |
|                        | Mouse TMEM127 sgRNA 1F       | CACCGTGGGAAGAGCGCTGCTTCCC                                              |
|                        | Mouse TMEM127 sgRNA 1R       | AAACGGGAAGCAGCGCTCTTCCCAC                                              |
|                        | Mouse TMEM127 sgRNA 2F       | CACCGCGTGCTGGGCTATGTAAACC                                              |
|                        | Mouse TMEM127 sgRNA 2R       | AAACGGTTTACATAGCCCAGCACGC                                              |
|                        | Mouse NonTargeting control F | CACCGGCGAGGTATTCGGCTCCGCG                                              |
|                        | Mouse NonTargeting control R | AAACCGCGGAGCCGAATACCTCGCC                                              |
